# Supplementary material
Source: PubMed Central journal article supplement (PMC3805507)
Supplement: NIHMS495793-supplement-1.pdf [file NIHMS495793-supplement-1.pdf]

| Region                    | Gene   | Symbol   | Aberration | Mutated | Strand | Start     | End       | Subclass      | q-value   | Notes                                         |
|---------------------------|--------|----------|------------|---------|--------|-----------|-----------|---------------|-----------|-----------------------------------------------|
| chr1:13739843-14175788    | 7799   | PRDM2    | AMP        | 0       | +      | 14024161  | 13899321  |               | 1.99E-07  |                                               |
| chr1:165777024-165782083  | 2629   | GBA      | AMP        | 0       | -      | 153481277 | 153470862 | Mesenchymal   | 2.05E-05  |                                               |
| chr1:228853399-228957682  | 22796  | COG2     | AMP        | 0       | +      | 228896354 | 228844824 | Proneural     | 1.96E-04  | Represses Mesenchymal (q-value 3.23E-15)      |
| chr1:241505619-242501344  | 10472  | ZNF238   | AMP        | 0       | +      | 242287403 | 242281183 | Proneural     | 3.59E-29  |                                               |
| chr3:9499871-9526402      | 375323 | LHFPL4   | AMP        | 0       | -      | 9570486   | 9515044   | Proneural     | 3.36E-27  |                                               |
| chr3:47718732-47727273    | 6599   | SMARCC1  | AMP        | 0       | -      | 47798409  | 47602381  | Proliferation | 8.26E-17  |                                               |
| chr3:182612378-183202372  | 5290   | PIK3CA   | AMP        | 1       | +      | 180435191 | 180349004 |               |           |                                               |
| chr5:132243613-132260263  | 84105  | PCBD2    | AMP        | 0       | +      | 134326235 | 134268708 | Mesenchymal   | 0.0080178 |                                               |
| chr5:139239028-139592760  | 51523  | CXXC5    | AMP        | 0       | +      | 139042864 | 139008484 |               |           | Represses Proliferation (q-value 0.00253576)  |
|                           | 84418  | C5orf32  | AMP        | 0       | +      | 139603558 | 139534836 | Mesenchymal   | 5.81E-20  |                                               |
| chr6:56459817-56650644    | 667    | DST      | AMP        | 1       | -      | 56615653  | 56430743  |               |           |                                               |
| chr6:86272367-86331787    | 57231  | SNX14    | AMP        | 0       | -      | 86360348  | 86271933  |               |           | Represses Mesenchymal (q-value 1.54E-05)      |
| chr6:99954799-99965320    | 25957  | SFRS18   | AMP        | 0       | -      | 99979928  | 99954561  |               |           |                                               |
| chr7:54454458-55680712    | 11328  | FKBP9    | AMP        | 1       | +      | 33013068  | 32963529  | Mesenchymal   | 8.74E-04  | Represses Proneural (q-value 4.02E-33)        |
|                           | 23480  | SEC61G   | AMP        | 0       | -      | 54794433  | 54787433  | Mesenchymal   | 0.005548  | Represses Proneural (q-value 6.80E-08)        |
|                           | 1956   | EGFR     | AMP        | 1       | +      | 55242525  | 55054218  |               |           | Represses Proneural (q-value 6.52E-04)        |
| chr7:91913540-92394627    | 57798  | GATAD1   | AMP        | 0       | +      | 91926678  | 91914700  |               |           |                                               |
| chr7:116107045-116449399  | 830    | CAPZA2   | AMP        | 0       | +      | 116346549 | 116289798 |               |           |                                               |
| chr8:2586263-2597303      | 54984  | PINX1    | AMP        | 0       | -      | 10734709  | 10660293  | Proliferation | 4.58E-05  | Represses Mesenchymal (q-value 1.86E-15)      |
| chr8:48892627-49005003    | 5591   | PRKDC    | AMP        | 1       | -      | 49035296  | 48848221  | Proliferation | 0.0193367 |                                               |
| chr8:103316826-103441976  | 51366  | UBR5     | AMP        | 0       | -      | 103494093 | 10333677  |               |           |                                               |
| chr8:141943613-141976701  | 5747   | PTK2     | AMP        | 0       | -      | 142080594 | 141737662 |               |           |                                               |
| chr10:70041777-70047996   | 80312  | TET1     | AMP        | 0       | +      | 70124245  | 69990122  | Proliferation | 1.03E-04  |                                               |
| chr11:88269107-88716407   | 2915   | GRM5     | AMP        | 0       | -      | 88436464  | 87877391  | Proneural     | 2.84E-31  |                                               |
| chr12:3845971-4316443     | 57097  | PARP11   | AMP        | 0       | -      | 3852869   | 3788287   | Proliferation | 1.23E-04  |                                               |
| chr12:4407496-4413581     | 5288   | PIK3C2G  | AMP        | 1       | +      | 18692619  | 18305740  | Proneural     | 5.41E-04  |                                               |
| chr13:19317332-19343260   | 9205   | ZMYM5    | AMP        | 0       | -      | 19335776  | 19295623  | Mesenchymal   | 2.33E-11  |                                               |
| chr14:25956819-26138825   | 4857   | NOVA1    | AMP        | 0       | -      | 26136800  | 25984928  | Proneural     | 8.26E-17  |                                               |
| chr14:59681354-59685916   | 51635  | DHR87    | AMP        | 0       | -      | 59701964  | 59681251  |               |           |                                               |
| chr14:73547559-73552263   | 957    | ENTPD5   | AMP        | 0       | -      | 73555779  | 73502933  | Mesenchymal   | 9.32E-04  |                                               |
| chr15:63175129-63293634   | 10081  | PDCD7    | AMP        | 0       | -      | 63213227  | 63196769  |               |           | Represses Proliferation (q-value 0.015412322) |
| chr15:89043119-89343034   | 641    | BLM      | AMP        | 0       | +      | 89159690  | 89061582  | Proliferation | 5.51E-04  | Represses Proneural (q-value 1.99E-07)        |
|                           | 9055   | PRC1     | AMP        | 0       | -      | 89338808  | 89310271  | Proliferation | 1.34E-22  |                                               |
| chr15:99630162-99632986   | 55829  | SELS     | AMP        | 0       | -      | 99635223  | 99628736  | Mesenchymal   | 2.19E-07  | Represses Proneural (q-value 1.00E-10)        |
| chr16:2396644-2447779     | 5170   | PDPK1    | AMP        | 0       | +      | 2593190   | 2527970   |               |           |                                               |
| chr16:18714369-18766671   | 23049  | SMG1     | AMP        | 0       | -      | 18845227  | 18723675  |               |           |                                               |
| chr16:73030028-73054806   | 2734   | GLG1     | AMP        | 0       | -      | 73198543  | 73038826  |               |           | Represses Proliferation (q-value 3.01E-04)    |
| chr16:77601508-77613910   | 51741  | WWOX     | AMP        | 0       | +      | 77804065  | 76690827  | Proneural     | 5.35E-05  |                                               |
| chr17:1524690-1549188     | 10594  | PRPF8    | AMP        | 0       | -      | 1534926   | 1500672   |               |           |                                               |
| chr17:15263158-15303784   | 28400  | CDRT4    | AMP        | 0       | -      | 15311650  | 15280056  |               |           | Represses Proliferation (q-value 6.97E-04)    |
| chr17:23979593-23994003   | 9703   | KIAA0100 | AMP        | 0       | -      | 23996300  | 23965584  |               |           |                                               |
| chr17:34445815-34452906   | 2064   | IRBB2    | -          | 1       | +      | 35138441  | 35097918  | Mesenchymal   | 1.465E-38 | Overexpression associated with Mesenchymal    |
| chr17:53200475-53256172   | 3690   | ITGB3    | -          | 1       | +      | 42745076  | 42686206  | Mesenchymal   | 6.44E-26  | Overexpression associated with Mesenchymal    |
|                           | 1277   | COL1A1   | -          | 1       | +      | 45633999  | 45616455  | Mesenchymal   | 6.35E-28  | Overexpression associated with Mesenchymal    |
| chr19:34978731-35006330   | 898    | CNNE1    | AMP        | 0       | +      | 35007059  | 34994740  | Proliferation | 2.94E-55  |                                               |
|                           | 85415  | RHPN2    | AMP        | 1       | -      | 38247664  | 38161337  | Mesenchymal   | 3.78E-15  |                                               |
| chr20:25616130-29404607   | 26152  | ZNF337   | AMP        | 0       | -      | 25625469  | 25602850  |               |           |                                               |
| chr20:55386446-55394760   | 8480   | RAE1     | AMP        | 0       | +      | 55386926  | 55359551  |               |           |                                               |
| chr21:32896033-32906105   | 56683  | C21orf59 | AMP        | 0       | -      | 32906789  | 32895854  | Proliferation | 0.0020467 |                                               |
| chr22:28477024-28507954   | 11200  | CHEK2    | AMP        | 0       | -      | 27467822  | 27413730  | Proliferation | 8.96E-33  |                                               |
|                           | 29796  | UQCRI10  | AMP        | 0       | +      | 28496402  | 28493357  |               |           |                                               |
| chr22:37225314-37232634   | 10521  | DDX17    | AMP        | 0       | -      | 37232291  | 37209388  |               |           |                                               |
| chr1:22225240-22248229    | 9923   | ZBTB40   | DEL        | 0       | +      | 22730237  | 22650930  |               |           |                                               |
| chr1:50786729-51315432    | 1031   | CDKN2C   | DEL        | 0       | +      | 51212897  | 51206954  | Proneural     | 0.0020467 | Represses Proliferation (q-value 3.73E-19)    |
| chr1:92942729-93285134    | 6125   | RPL5     | DEL        | 0       | +      | 93080069  | 93070181  |               |           | Represses Proliferation (q-value 8.40E-06)    |
| chr1:93828831-93850948    | 8412   | BCAR3    | DEL        | 0       | -      | 93919973  | 93799936  | Mesenchymal   | 9.25E-04  |                                               |
| chr1:94113131-94119058    | 30836  | DNTTIP2  | DEL        | 0       | -      | 94117350  | 94107601  |               |           |                                               |
| chr6:32305911-32766022    | 3710   | ITPR3    | DEL        | 1       | +      | 33772326  | 33697133  | Proneural     | 2.17E-13  | Represses Mesenchymal (q-value 2.17E-13)      |
| chr6:102173151-102187590  | 2898   | GRIK2    | DEL        | 0       | +      | 102624651 | 101953581 | Mesenchymal   | 7.09E-12  | Represses Proneural (q-value 2.36E-40)        |
| chr6:163855259-163862036  | 9444   | QKI      | DEL        | 0       | +      | 163919618 | 163755664 | Mesenchymal   | 8.21E-19  |                                               |
| chr7:110730379-110831270  | 5294   | PIK3CG   | DEL        | 1       | +      | 106334828 | 106293159 |               |           |                                               |
|                           | 83943  | IMMP2L   | DEL        | 0       | -      | 110989583 | 110090345 | Proliferation | 1.42E-02  |                                               |
| chr8:146250764-146264845  | 65265  | C8orf33  | DEL        | 0       | +      | 146252220 | 146248627 |               |           |                                               |
| chr9:21106003-23726782    | 55958  | KLHL9    | DEL        | 0       | -      | 21325429  | 21321017  | Mesenchymal   | 4.33E-13  |                                               |
|                           | 4507   | MTAP     | DEL        | 0       | +      | 21855969  | 21792634  | Mesenchymal   | 2.52E-04  |                                               |
|                           | 1030   | CDKN2B   | DEL        | 0       | -      | 21999312  | 21992901  | Mesenchymal   | 4.08E-04  |                                               |
|                           | 1993   | ELAVL2   | DEL        | 0       | -      | 23816063  | 23680102  | Mesenchymal   | 1.93E-04  | Represses Proneural (q-value 5.74E-13)        |
| chr9:137152591-137166868  | 7295   | TXN      | DEL        | 0       | -      | 112058599 | 112046130 |               |           | Represses Proliferation (q-value 0.011146936) |
| chr10:89440845-90478884   | 84896  | ATAD1    | DEL        | 0       | -      | 89567897  | 89502854  |               |           |                                               |
|                           | 5728   | PTEN     | DEL        | 1       | +      | 89718512  | 89613174  | Proliferation | 0.0034467 |                                               |
| chr10:90658491-90690701   | 57559  | STAMBPL1 | DEL        | 0       | -      | 90673224  | 90630005  | Mesenchymal   | 7.93E-04  |                                               |
|                           | 114815 | SORCS1   | DEL        | 0       | -      | 108914456 | 108323410 | Proliferation | 0.0380446 | Represses Proneural (q-value 2.50E-05)        |
| chr11:67615842-67668608   | 1119   | CHKA     | DEL        | 0       | -      | 67645434  | 67576901  |               |           |                                               |
| chr12:129863428-129898520 | 2054   | STX2     | DEL        | 0       | -      | 129889764 | 129840099 |               |           |                                               |
| chr13:47845531-47937119   | 5925   | RB1      | DEL        | 1       | +      | 47954027  | 47775883  |               |           |                                               |
| chr14:32754122-33049436   | 64067  | NPAS3    | DEL        | 0       | +      | 33343133  | 3278209   |               |           |                                               |
| chr14:49791132-49796326   | 79944  | L2HGDH   | DEL        | 0       | -      | 49848697  | 49778901  | Mesenchymal   | 3.10E-04  |                                               |
| chr16:6055963-6846483     | 54715  | RFXO1    | DEL        | 0       | +      | 7703341   | 6009132   | Mesenchymal   | 0.0042207 | Represses Proneural (q-value 5.95E-17)        |
| chr16:22731680-23057052   | 57478  | USP31    | DEL        | 0       | -      | 23068009  | 22980228  |               |           |                                               |
| chr17:7409271-7554839     | 7157   | TP53     | DEL        | 1       | -      | 7531588   | 7512444   |               |           |                                               |
| chr17:26374291-26797943   | 4763   | NF1      | DEL        | 1       | +      | 26728821  | 26446070  | Mesenchymal   | 6.75E-07  | Represses Proneural (q-value 5.44E-06)        |
| chr19:56859203-56974269   | 945    | CD33     | DEL        | 0       | +      | 56435086  | 56420146  | Proliferation | 0.0062    | Represses Mesenchymal (q-value 5.12E-06)      |
| chr19:57402197-57539512   | 147657 | ZNF480   | DEL        | 0       | +      | 57520986  | 57492237  | Proneural     | 0.0121777 |                                               |

Proneural 11  
Proliferation 14  
Mesenchymal 23
